# Supplementary material
Source: PubMed Central journal article supplement (PMC7138275)

Figure S1. Heat map of differentially expressed genes in OA. The top two rows represent the classification of samples and data-sets; red squares represent non-OA samples, blue squares represent OA samples, purple squares indicate data from GSE117999 and green squares indicate data from GSE114007. The columns represent 58 cartilage samples, and the rows represent 592 differentially expressed mRNAs and microRNAs. Colored pixels represent changes in the expression levels: Green, downregulation; black, no change; red, upregulation. OA, osteoarthritis.

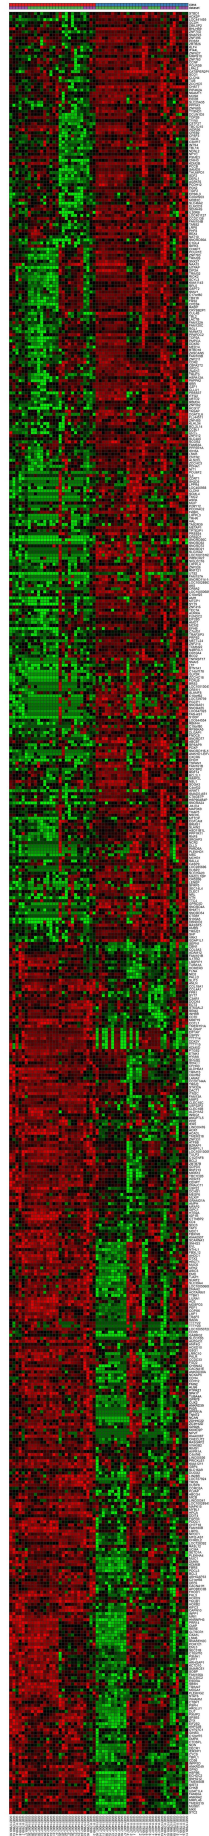

Supplement: Supplementary_Data.pdf [file Supplementary_Data.pdf]
